# Supplementary material for: Encouraging Patient Portal Use in the Patient-Centered Medical Home: Three Stakeholder Perspectives
Source: PubMed Central journal article supplement (PMC5141333; doi:10.2196/jmir.6488), 2016-11-22
Supplement: jmir_v18i11e308_app1.pdf [file jmir_v18i11e308_app1.pdf]

Table 1. Principles of Patient-Centered Medical Homes and Exemplary My HealtheVet Patient Portal Features.

| Patient-Centered Medical Home Principle                                                                                                                                                                                | Exemplary My HealtheVet Patient Portal Features                                                                                                                                                                                                                                                                                                                                                                             |
|------------------------------------------------------------------------------------------------------------------------------------------------------------------------------------------------------------------------|-----------------------------------------------------------------------------------------------------------------------------------------------------------------------------------------------------------------------------------------------------------------------------------------------------------------------------------------------------------------------------------------------------------------------------|
| <p>Whole Person. The primary care team is focused on the whole person, with patient preferences guiding care.</p>                                                                                                      | <p>Health calendar<br/>                     Health history<br/>                     Health information collection<br/>                     Health screening tools<br/>                     Links to community resources<br/>                     Online courses<br/>                     Track health diaries and measures<br/>                     VA resource information<br/>                     Wellness reminders</p> |
| <p>Team-Based Care. Primary care is delivered by an interdisciplinary team led by a primary care provider using facilitative leadership skills.</p>                                                                    | <p>Appointment views<br/>                     Caregiver, provider, &amp; health insurance information<br/>                     Secure messaging</p>                                                                                                                                                                                                                                                                         |
| <p>Enhanced Access. Veterans receive the care they need at the time they need it from an interdisciplinary team functioning at the highest level of their competency.</p>                                              | <p>Appointment views<br/>                     Health screening tools<br/>                     Medication summary<br/>                     Prescription refills<br/>                     Secure messaging<br/>                     Wellness reminders</p>                                                                                                                                                                    |
| <p>Comprehensive. Primary care serves as a point of first contact for a broad range of medical, behavioral and psychosocial needs that are fully integrated with other VA health services and community resources.</p> | <p>Caregiver, provider, &amp; health insurance information<br/>                     Health calendar<br/>                     Health information collection<br/>                     Health screening tools<br/>                     Links to community resources<br/>                     Online courses<br/>                     Records of care received<br/>                     VA resource information</p>             |
| <p>Relationship-based. Every patient has an established and continuous relationship with a personal primary care provider.</p>                                                                                         | <p>Appointment views<br/>                     Records of care received<br/>                     Secure messaging</p>                                                                                                                                                                                                                                                                                                        |
| <p>Communication. The communication between the Veteran patient and other team members is honest, respectful, reliable and culturally sensitive.</p>                                                                   | <p>Health information collection<br/>                     Online courses<br/>                     Prescription refills<br/>                     Secure messaging<br/>                     Wellness reminders</p>                                                                                                                                                                                                            |
| <p>Coordination. The primary care team coordinates care for the patient across and between the health care systems including the private sector.</p>                                                                   | <p>Caregiver, provider, &amp; health insurance information<br/>                     Medication summary<br/>                     Printable VA health summary<br/>                     Records of care received</p>                                                                                                                                                                                                           |
